# Supplementary material
Source: publisher figshare collection journal article supplement (https://acs.figshare.com/ndownloader/files/4669855)
Supplement: Supplementary file 1 [file 4669855]

# A Highly Stereoselective TMSOTf-Mediated Catalytic Carbocupration of Alkynoates

*Amanda J. Mueller and Michael P. Jennings\**

Department of Chemistry, The University of Alabama, Tuscaloosa, AL 35487-0336

[jenningsm@bama.ua.edu](mailto:jenningsm@bama.ua.edu)

## **Table of Contents:**

|                                                             |       |
|-------------------------------------------------------------|-------|
| Experimental Section                                        | S1    |
| General Experimental Procedure                              | S1-S2 |
| Tabulated <sup>1</sup> H NMR Data of All Compounds Reported | S2-S4 |
| <sup>1</sup> H NMR spectra of <b>2a</b>                     | S5    |
| <sup>1</sup> H NMR spectra of <b>2b</b>                     | S6    |
| <sup>13</sup> C NMR spectra of <b>2b</b>                    | S7    |
| <sup>1</sup> H NMR spectra of <b>2c</b>                     | S8    |
| <sup>1</sup> H NMR spectra of <b>2d</b>                     | S9    |
| <sup>1</sup> H NMR spectra of <b>2e</b>                     | S10   |
| <sup>1</sup> H NMR spectra of <b>2f</b>                     | S11   |
| <sup>1</sup> H NMR spectra of <b>2g</b>                     | S12   |
| <sup>1</sup> H NMR spectra of <b>2h</b>                     | S13   |
| <sup>1</sup> H NMR spectra of <b>2i</b>                     | S14   |
| <sup>1</sup> H NMR spectra of <b>3</b>                      | S15   |
| <sup>1</sup> H NMR spectra of <b>4</b>                      | S16   |
| References                                                  | S17   |

## Experimental Section

All of the reactions were performed under Ar in flame-dried glassware. Anhydrous tetrahydrofuran (THF) was obtained from a commercial source and used without purification. Copper(I) iodide (98% purity) and lithium chloride (LiCl, 99%+, ACS) were obtained from Aldrich and used without any purification. The NMR spectra were recorded with either a 360 or 500 MHz Bruker spectrometer.  $^1\text{H}$  NMR spectra were obtained using  $\text{CDCl}_3$  as the solvent with either tetramethylsilane (TMS:  $\delta = 0$  ppm) or chloroform ( $\text{CHCl}_3$ :  $\delta = 7.26$  ppm) as the internal standard. Column chromatography was performed using 60-200  $\mu\text{m}$  silica gel. Analytical thin layer chromatography was performed on silica coated glass plates with F-254 indicator. Visualization was accomplished by UV light (254 nm) and  $\text{KMnO}_4$ .

**General Experimental Procedure for the TMSOTf-Promoted Catalytic Carbocupration of **1a** with PhMgBr:** CuI (0.029 g, 0.15 mmol) and LiCl (0.013 g, 0.30 mmol) was placed in a 100 mL round bottom flask (flame dried under vacuum) under Ar. Dry THF (20 mL) was added to the salts, and the mixture was stirred at room temperature for a period of 0.5 h until complete dissolution had occurred. The clear, light yellow homogeneous solution was cooled to  $-78^\circ\text{C}$ , and **1a** (0.294 g, 3.0 mmol) was added, followed by TMSOTf (1.05 eq., 0.57 mL, 3.15 mmol). After 5 minutes at  $-78^\circ\text{C}$ , phenylmagnesium bromide (1.2 eq., 1.2 mL, 3.6 mmol) was added dropwise with a syringe, and the solution was stirred at  $-78^\circ\text{C}$  for 1 h. Trifluoroacetic acid (1.2 eq., 0.5 mL, 3.6 mmol) was added to quench the reaction at  $-78^\circ\text{C}$ , and the mixture was allowed to warm to room temperature and stir for 30 min. The product was extracted with sat.  $\text{NaHCO}_3$ ,  $\text{Et}_2\text{O}$  (3 X 25 mL), and the combined organic layers were washed with deionized water followed by saturated  $\text{NH}_4\text{Cl}$ . The organic layer was separated, dried with  $\text{MgSO}_4$ , and concentrated in vacuo to give the crude product, which was then analyzed by  $^1\text{H}$  NMR spectroscopy to determine diastereoselectivity. Column chromatography of the crude material (10% ethyl acetate in hexanes) afforded a 91% yield of the pure cinnamate product.

### Tabulated $^1\text{H}$ NMR

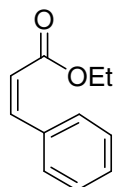

$^1\text{H}$  NMR (360 MHz,  $\text{CDCl}_3$ )  $\delta$  7.36 (m, 5H), 6.95 (d,  $J=12.7$  Hz, 1H), 5.96 (d,  $J=12.7$  Hz, 1H), 4.16 (q,  $J=7.3$  Hz, 2H), 1.20 (t,  $J=7.3$  Hz, 3H)<sup>1</sup>

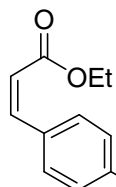

$^1\text{H}$  NMR (360 MHz,  $\text{CDCl}_3$ )  $\delta$  7.68 (dd,  $J=8.8, 2.9$  Hz, 2H), 7.08 (dd,  $J=8.8, 8.4$  Hz, 2H), 6.93 (d,  $J=12.5$  Hz, 1H), 5.96 (d,  $J=12.5$  Hz, 1H), 4.19 (q,  $J=7.0$  Hz, 2H), 1.30 (t,  $J=7.0$  Hz, 3H)<sup>2</sup>  $^{13}\text{C}$  NMR (125 MHz,  $\text{CDCl}_3$ ) 164.9 (d,  $J=249.3$  Hz), 161.9, 142.0, 132.0 (d,  $J=8.8$  Hz), 130.8 (d,  $J=2.8$  Hz), 119.5, 114.9 (d,  $J=21.0$  Hz), 60.2, 14.0<sup>2</sup> IR: 2983, 2361, 1719, 1601, 1509, 1159, 1031, 853  $\text{cm}^{-1}$  HRMS (EI) calculated for  $\text{C}_{11}\text{H}_{11}\text{FO}_2$  (M<sup>+</sup>): 194.0743, found: 194.0745.

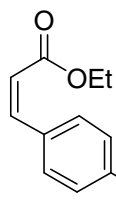

$^1\text{H}$  NMR (360 MHz,  $\text{CDCl}_3$ )  $\delta$  7.69 (d,  $J=8.8$  Hz, 2H), 6.88 (d,  $J=8.8$  Hz, 2H) 6.84 (d,  $J=12.5$  Hz, 1H), 5.82 (d,  $J=12.5$  Hz, 1H), 4.19 (q,  $J=7.0$  Hz, 2H), 3.82 (s, 3H) 1.26 (t,  $J=7.0$  Hz, 3H)<sup>3</sup>

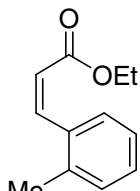

$^1\text{H}$  NMR (360 MHz,  $\text{CDCl}_3$ )  $\delta$  7.36 (m, 4H), 7.18 (d,  $J=12.3$  Hz, 1H), 6.12 (d,  $J=12.3$  Hz, 1H), 4.19 (q,  $J=7.3$  Hz, 2H), 2.35 (s, 3H) 1.21 (t,  $J=7.3$  Hz, 3H)<sup>4</sup>

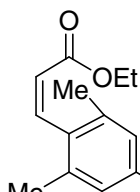

$^1\text{H}$  NMR (360 MHz,  $\text{CDCl}_3$ )  $\delta$  7.01 (d,  $J=11.8$  Hz, 1H), 6.83 (s, 2H), 6.09 (d,  $J=11.8$  Hz, 1H), 4.09 (q,  $J=7.3$  Hz, 2H), 2.25 (s, 3H), 2.14 (s, 6H), 1.15 (t,  $J=7.3$  Hz, 3H)<sup>5</sup>

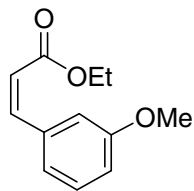

$^1\text{H}$  NMR (360 MHz,  $\text{CDCl}_3$ )  $\delta$  7.35 (m, 2H), 7.18 (m, 1H), 6.91 (d,  $J=12.5$  Hz, 1H), 6.90 (m, 1H), 5.96 (d,  $J=12.5$  Hz, 1H), 4.19 (q,  $J=7.0$  Hz, 2H), 3.88 (s, 3H) 1.25 (t,  $J=7.0$  Hz, 3H)<sup>6</sup>

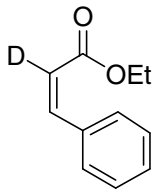

$^1\text{H}$  NMR (360 MHz,  $\text{CDCl}_3$ )  $\delta$  7.38 (m, 5H), 6.93 (br s, 1H), 4.26 (q,  $J=7.3$  Hz, 2H), 1.17 (t,  $J=7.3$  Hz, 3H)<sup>7</sup>

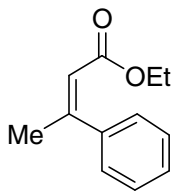

$^1\text{H}$  NMR (360 MHz,  $\text{CDCl}_3$ )  $\delta$  7.40 (m, 4H), 7.26 (m, 1H), 5.95 (q,  $J=1.6$  Hz, 1H), 4.25 (q,  $J=7.2$  Hz, 2H), 2.24 (d,  $J=1.6$  Hz, 3H) 1.30 (t,  $J=7.2$  Hz, 3H)<sup>8</sup>

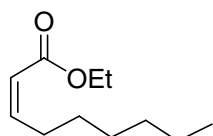

$^1\text{H}$  NMR (360 MHz,  $\text{CDCl}_3$ )  $\delta$  6.35 (dt,  $J=11.5, 1.7$ , 1H), 5.77 (dt,  $J=11.6, 1.6$ , 1H), 4.16 (q,  $J=7.3$  Hz, 2H), 2.61 (m, 2H), 1.46-1.33 (m, 8H), 1.30 (t,  $J=7.3$  Hz, 3H), 0.96 (t,  $J=7.9$  Hz, 3H)<sup>9</sup>

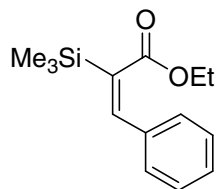

$^1\text{H}$  NMR (360 MHz,  $\text{CDCl}_3$ )  $\delta$  7.30 (m, 5H), 6.79 (s, 1H), 4.14 (q,  $J=7.3$  Hz, 2H), 1.17 (t,  $J=7.3$  Hz, 3H), 0.21 (s, 9H)<sup>10</sup>

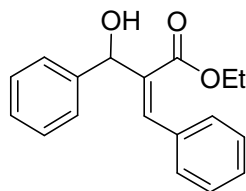

$^1\text{H}$  NMR (360 MHz,  $\text{CDCl}_3$ )  $\delta$  7.35 (m, 10H), 7.01 (s, 1H), 5.66 (d,  $J=5.6$  Hz, 1H), 4.08 (q,  $J=7.2$  Hz, 2H), 3.20 (d,  $J=6.1$  Hz, 1H), 1.04 (t,  $J=7.2$  Hz, 3H)<sup>11</sup>

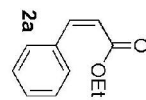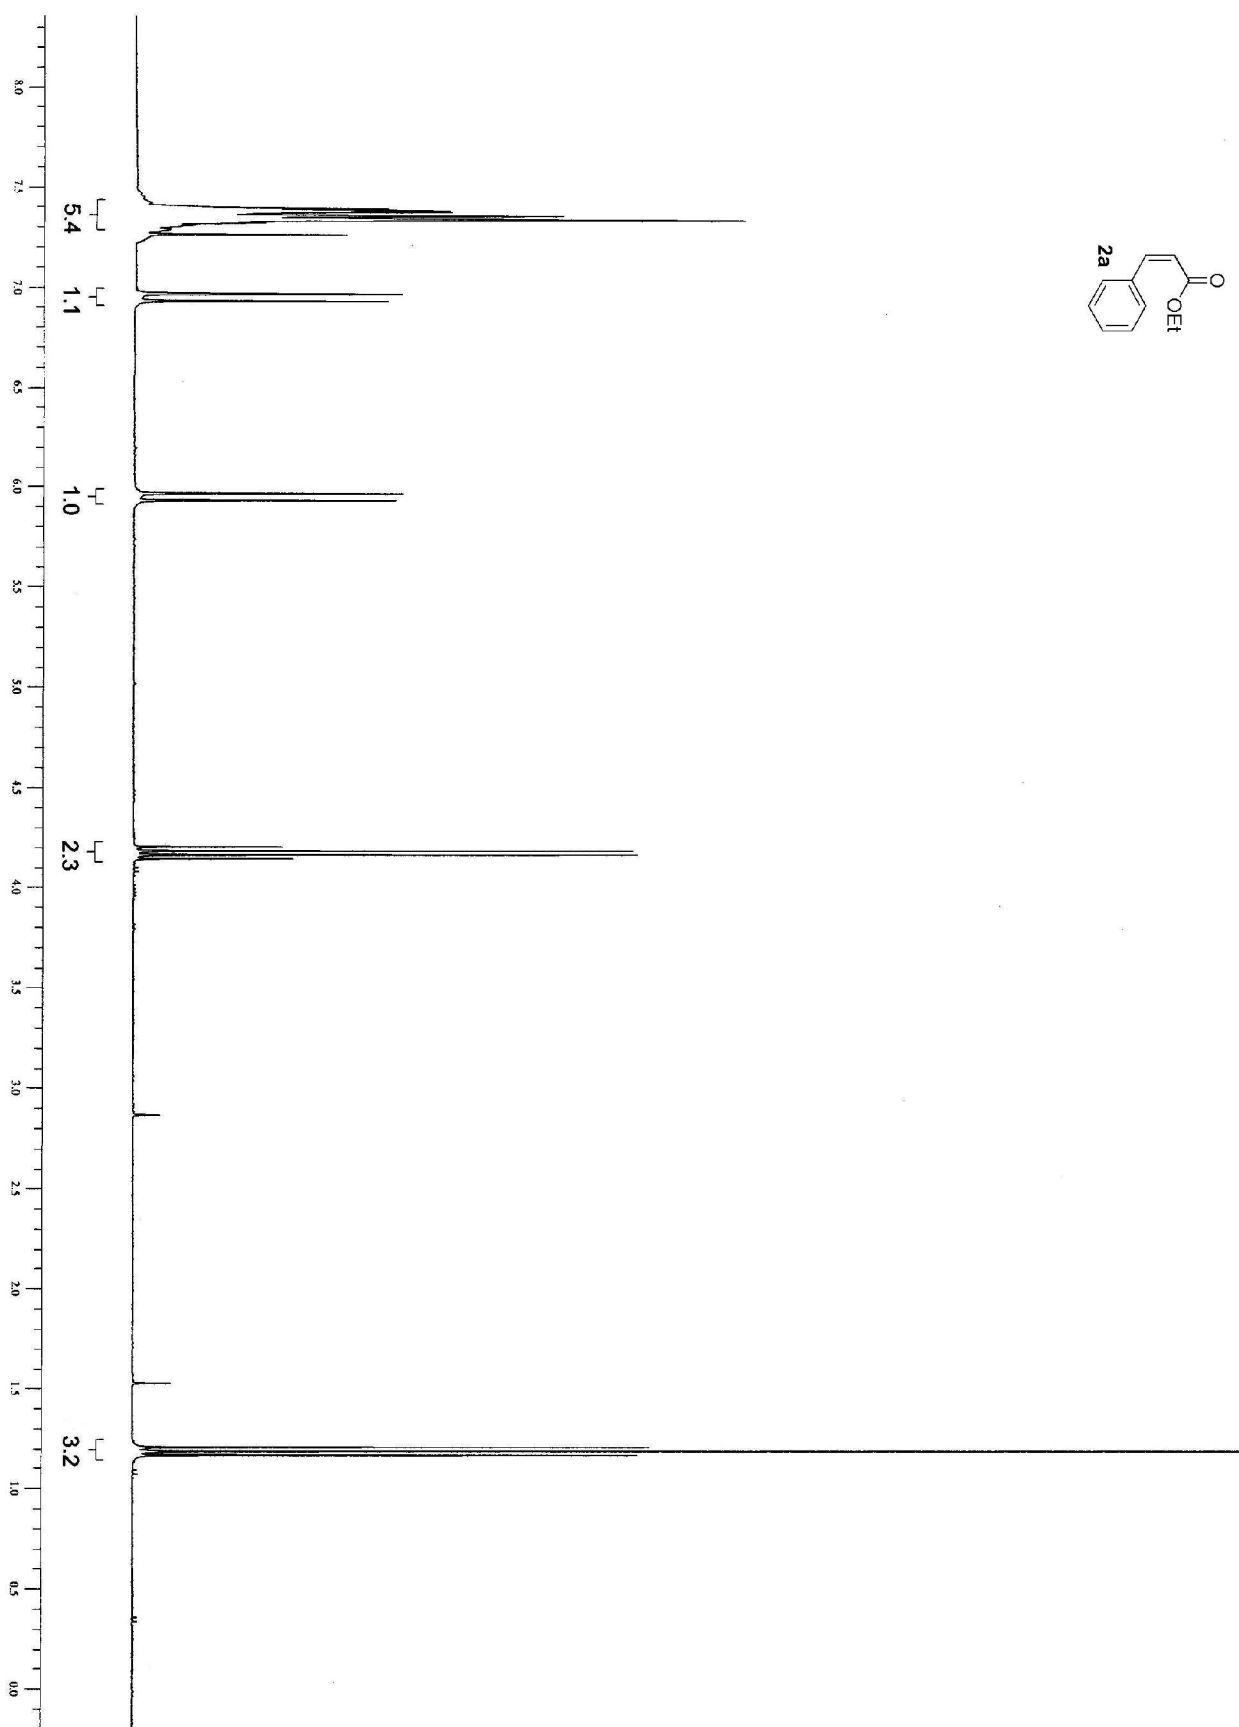

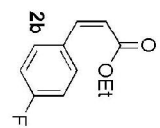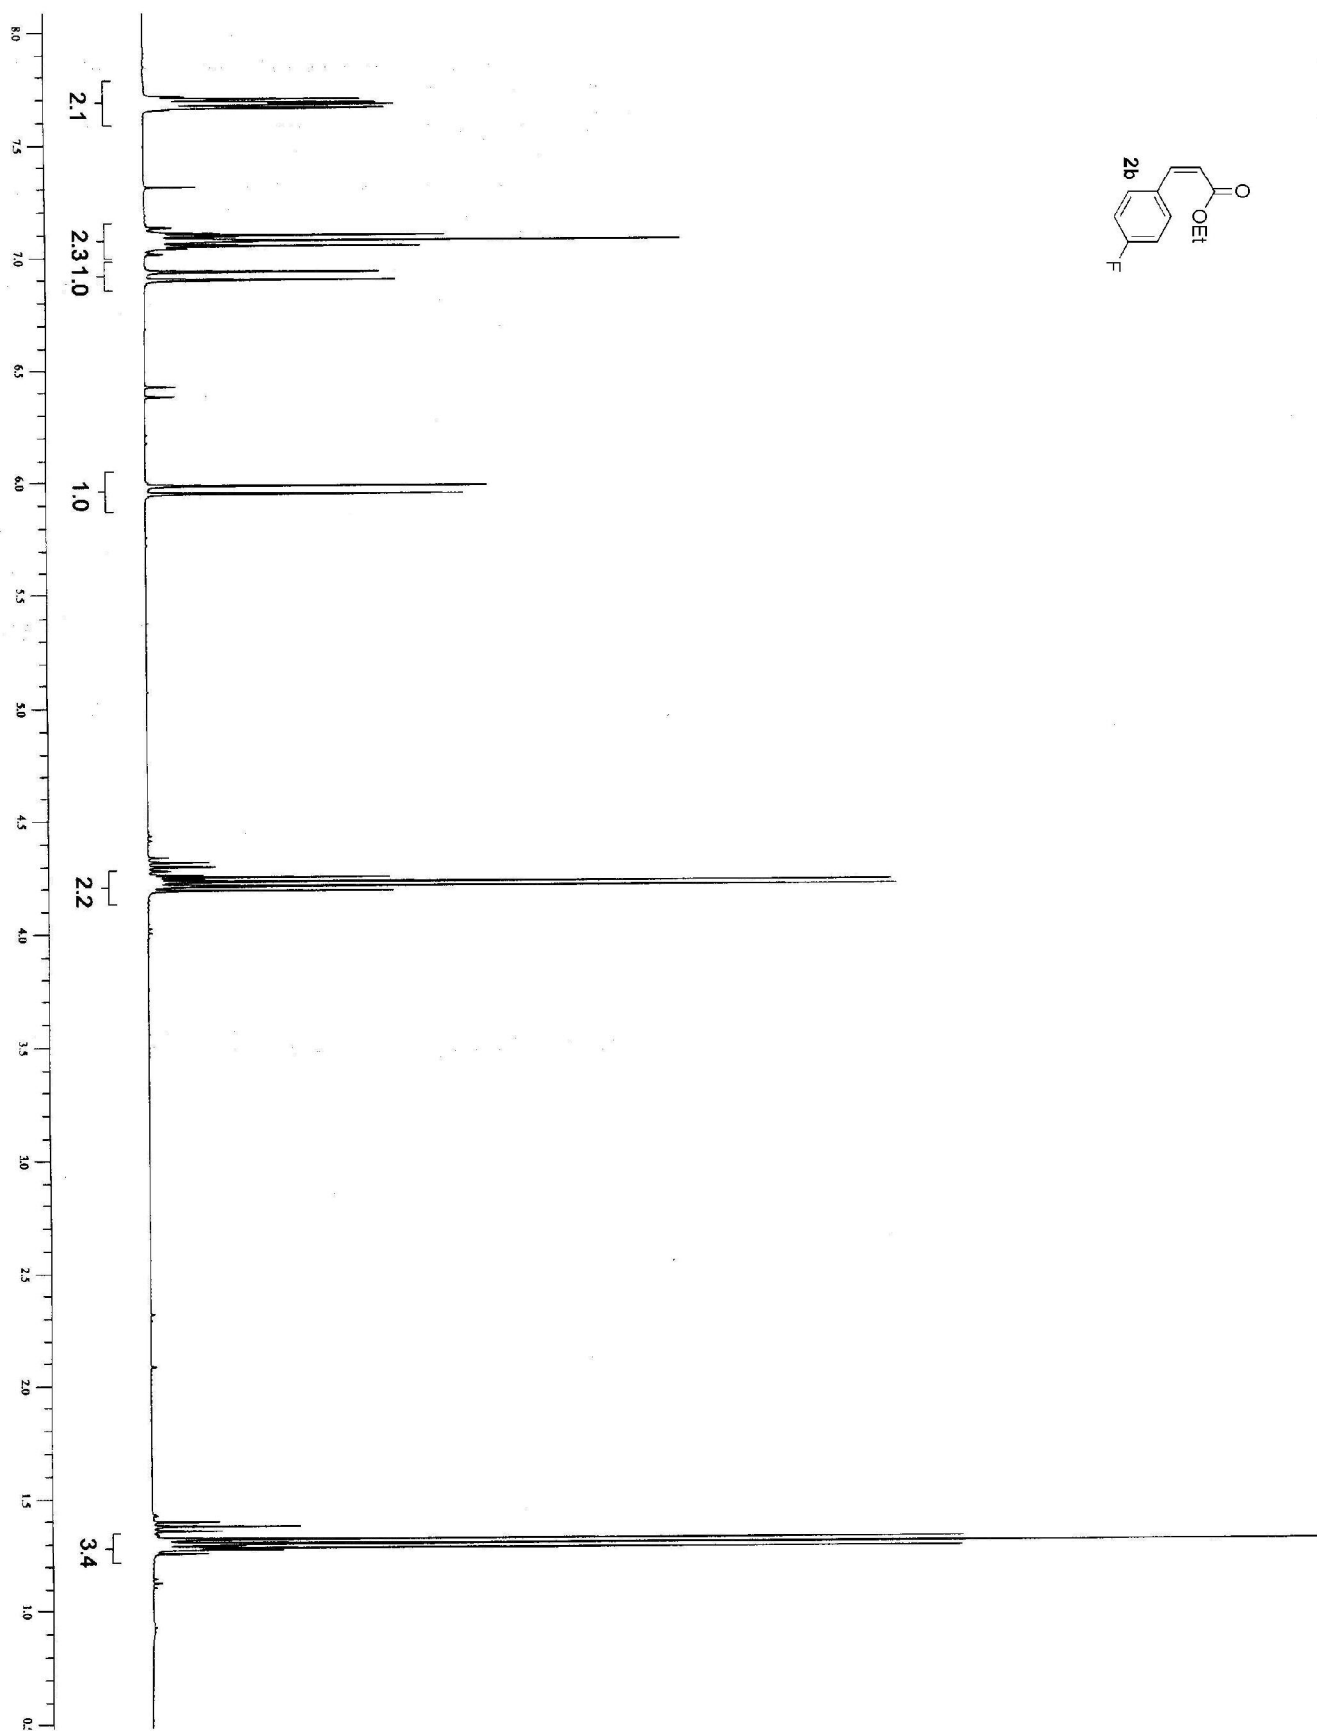

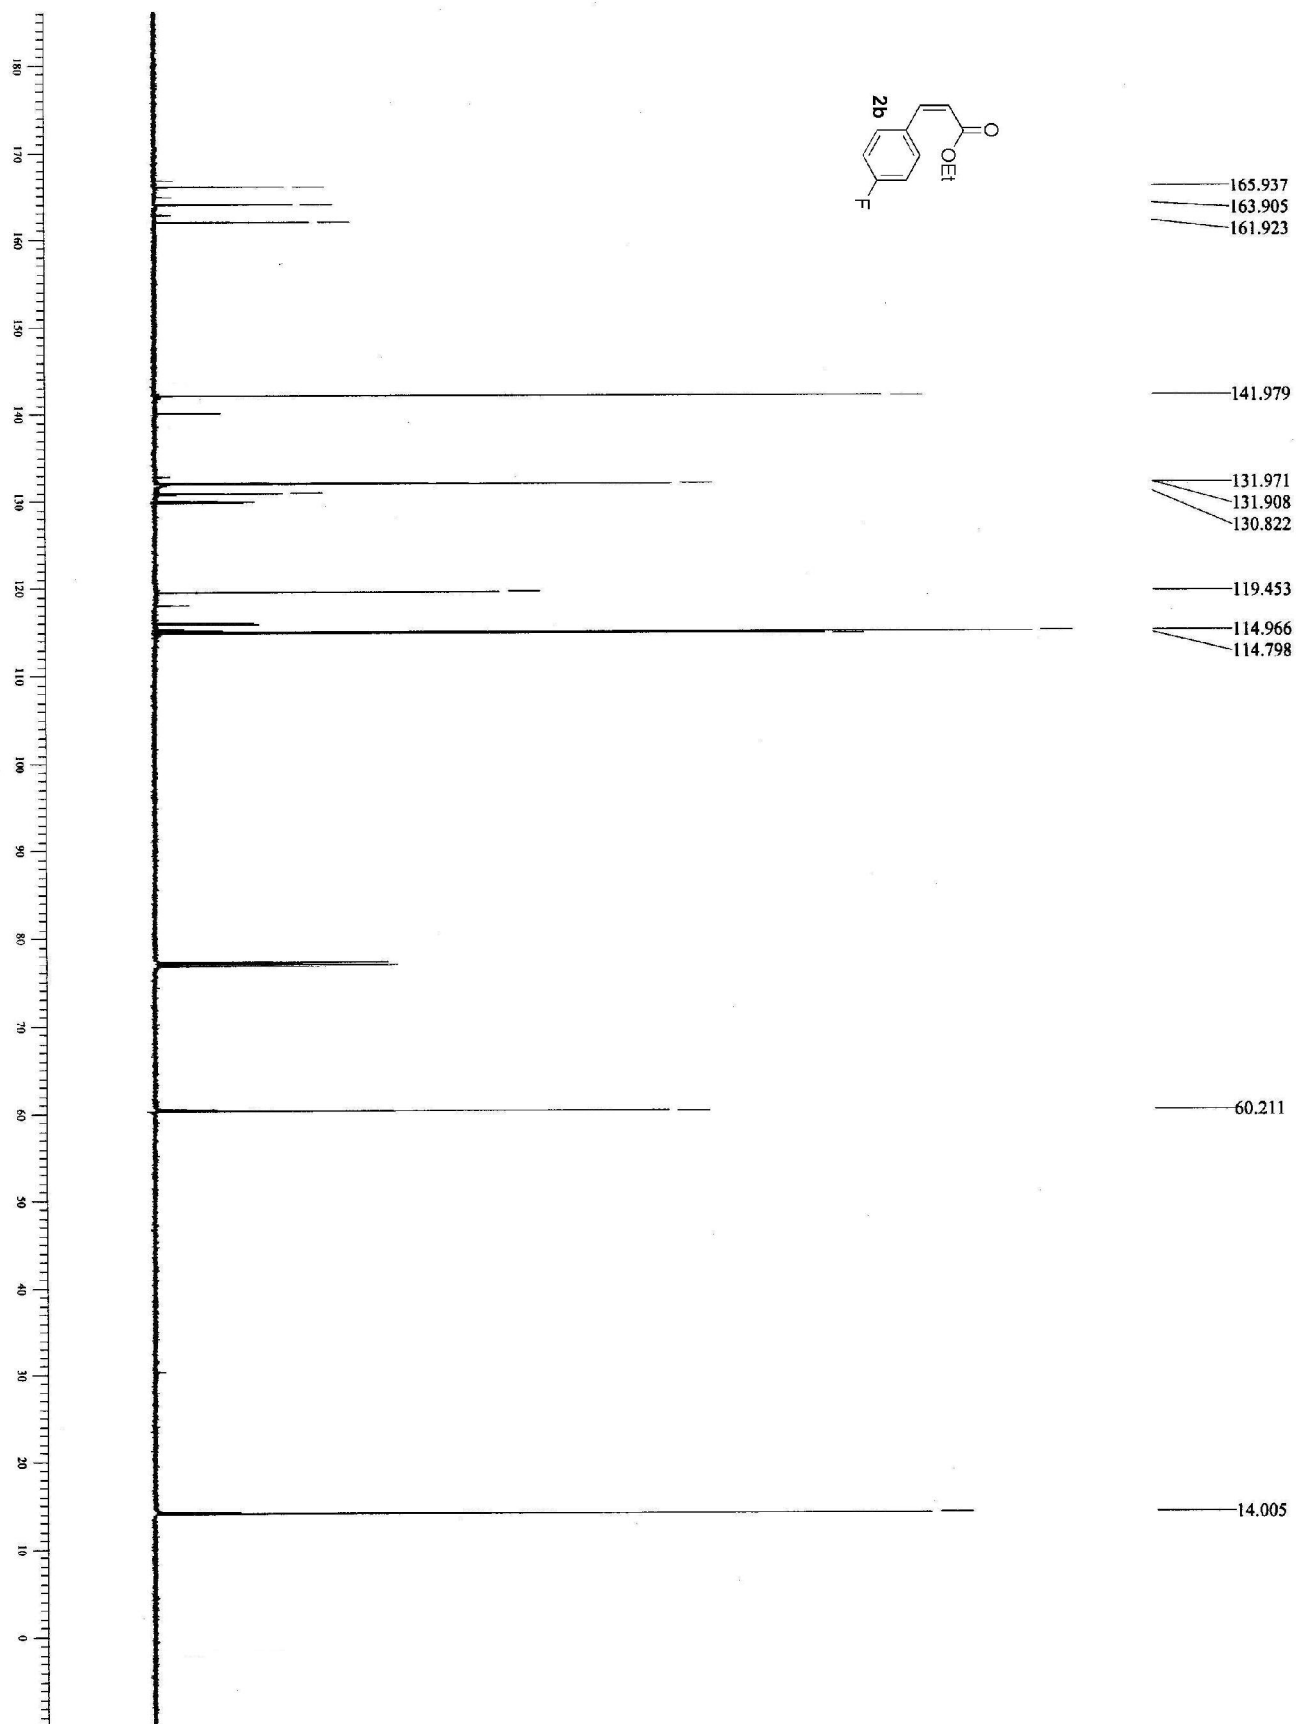

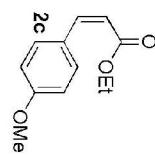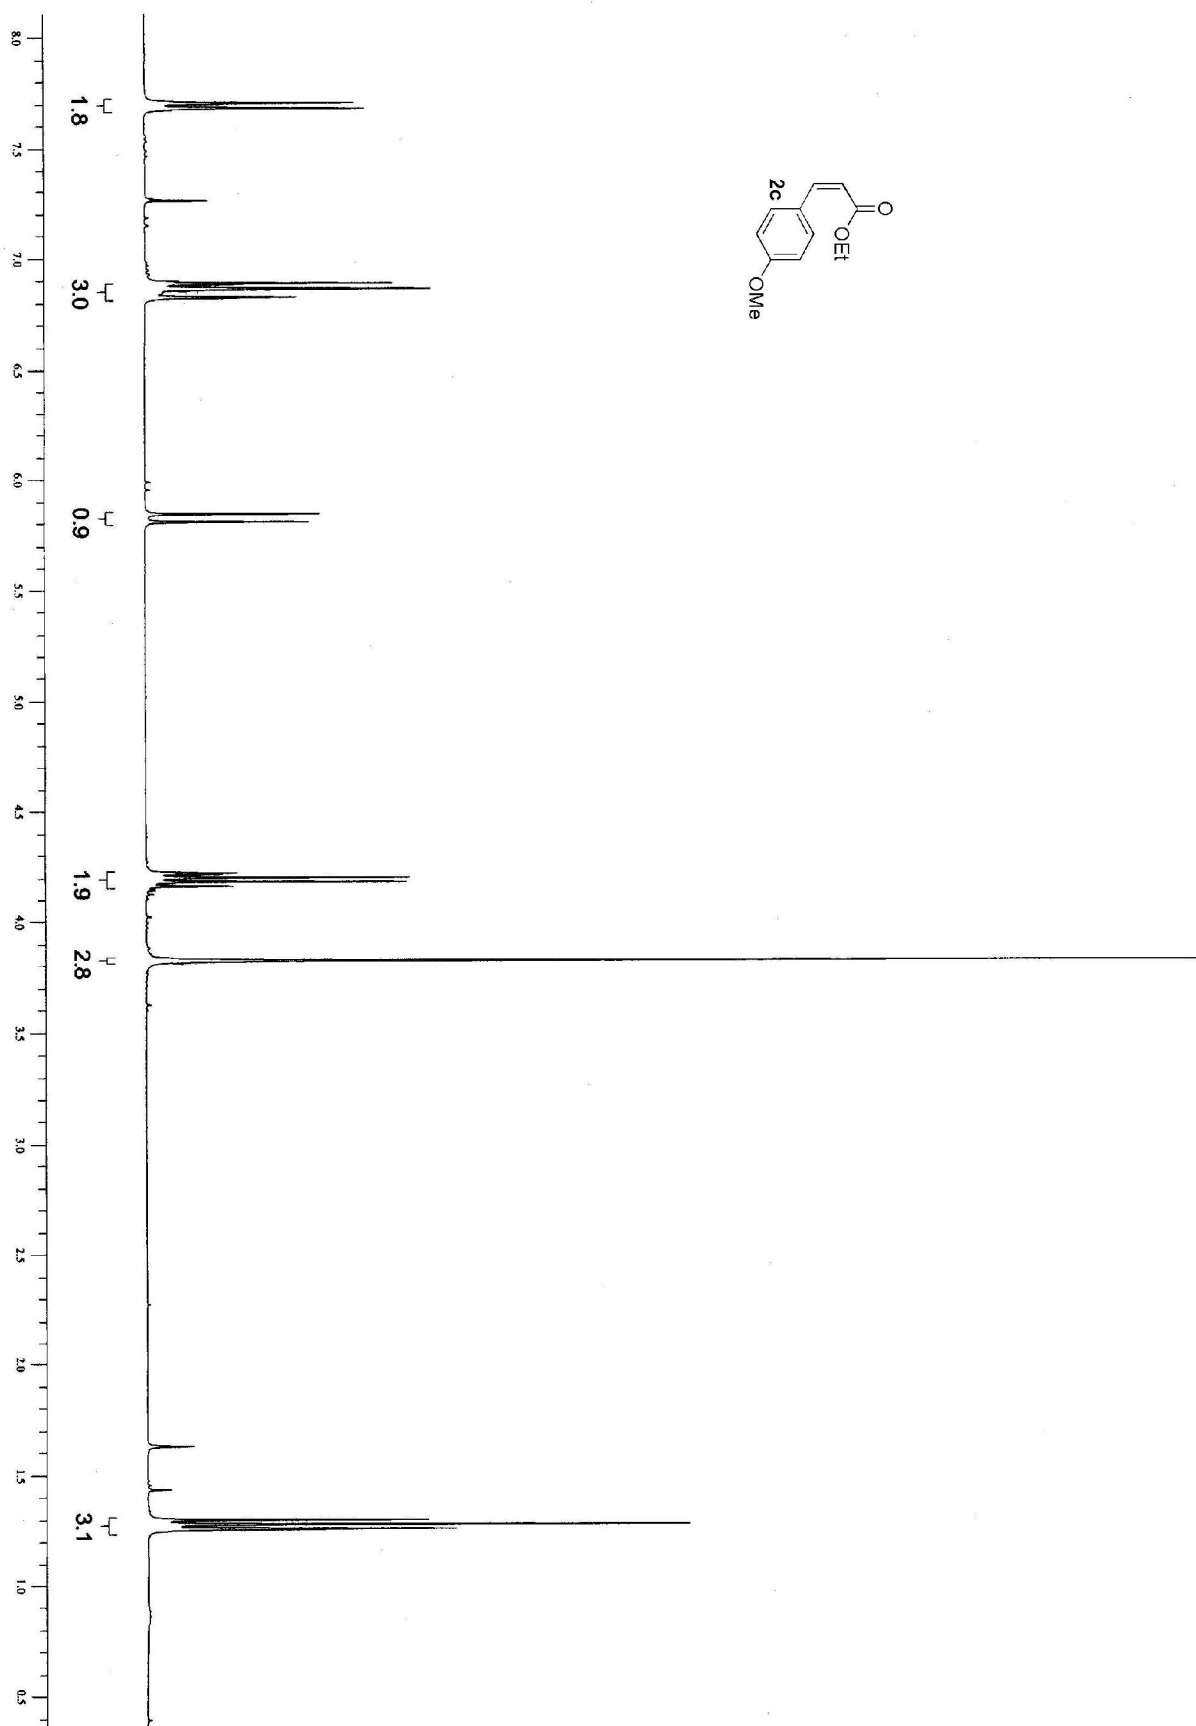



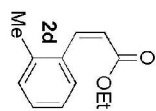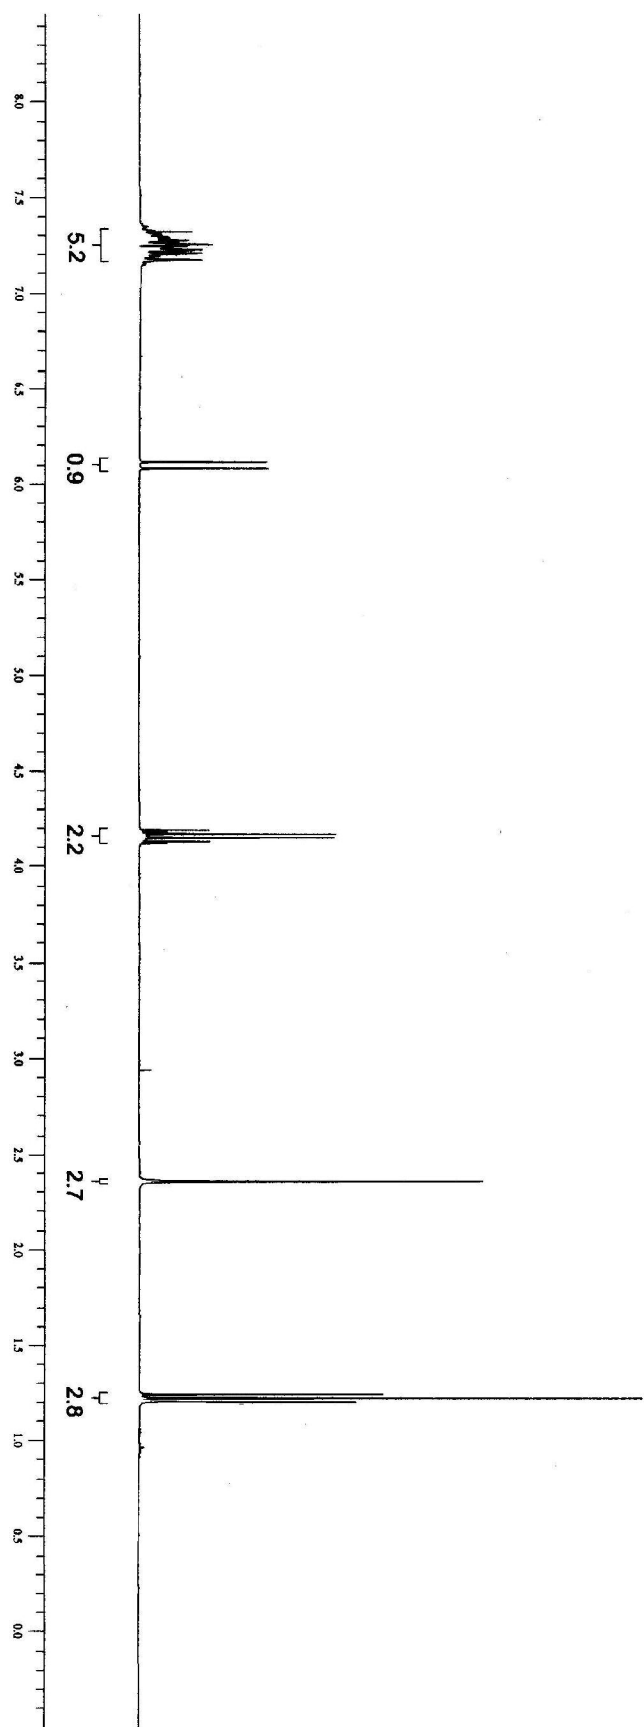

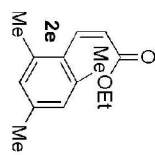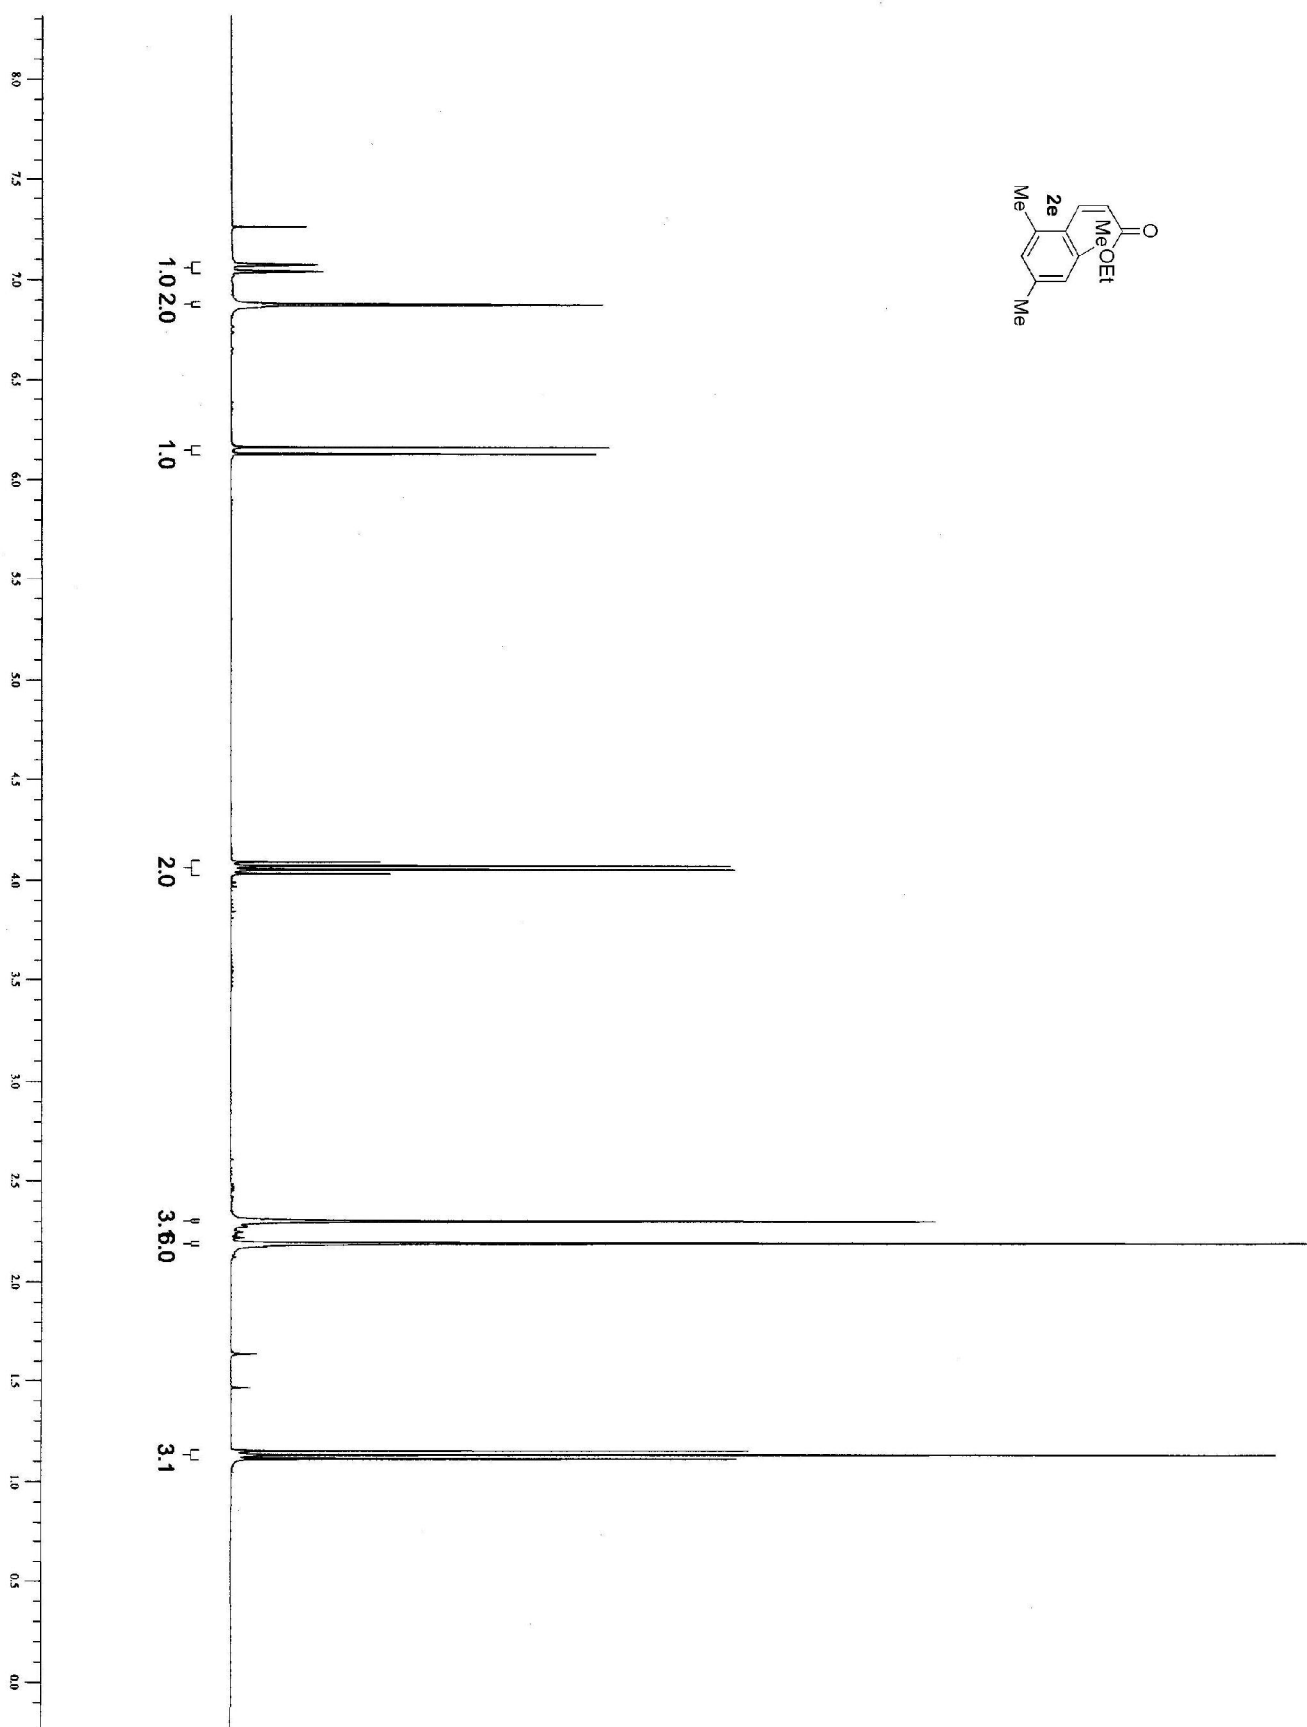

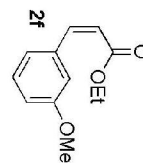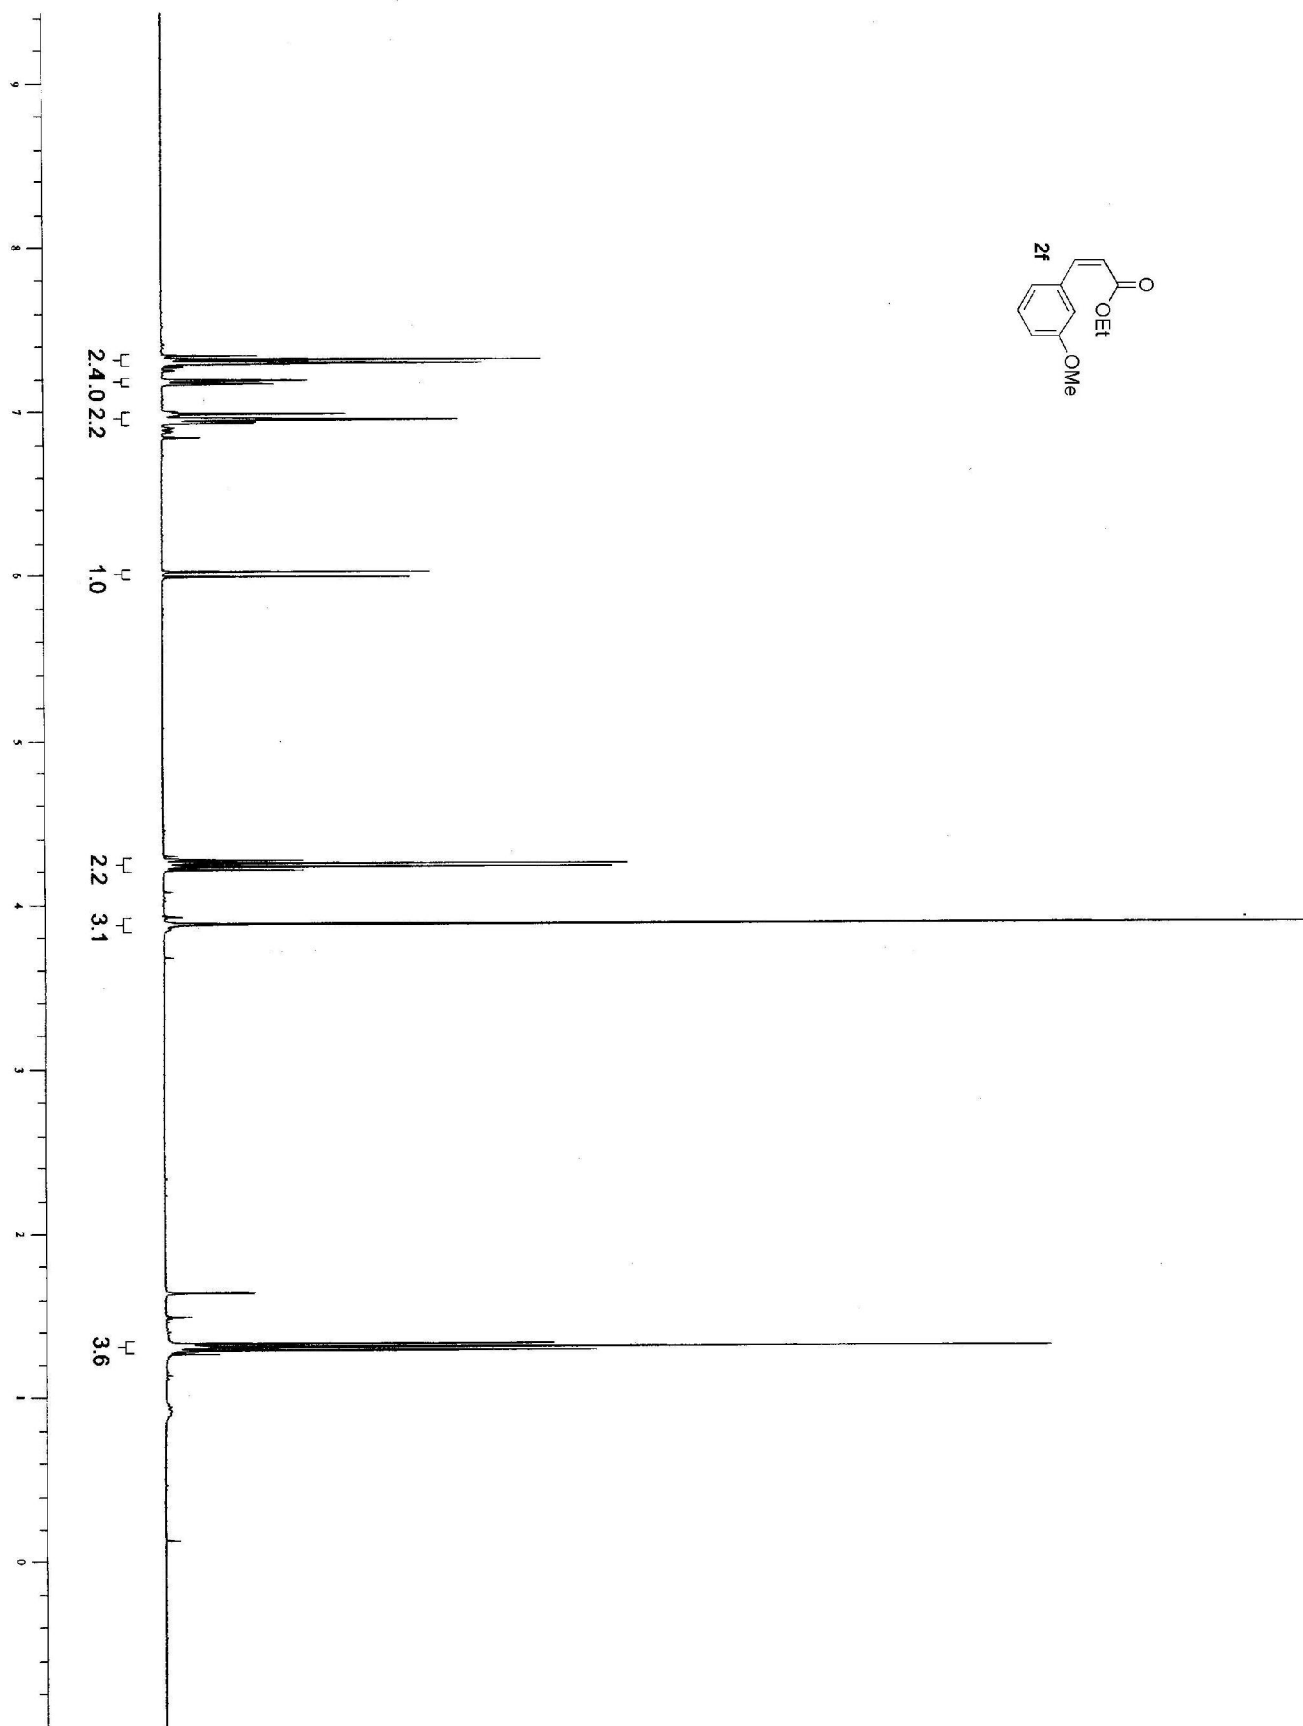

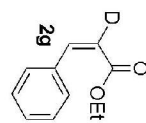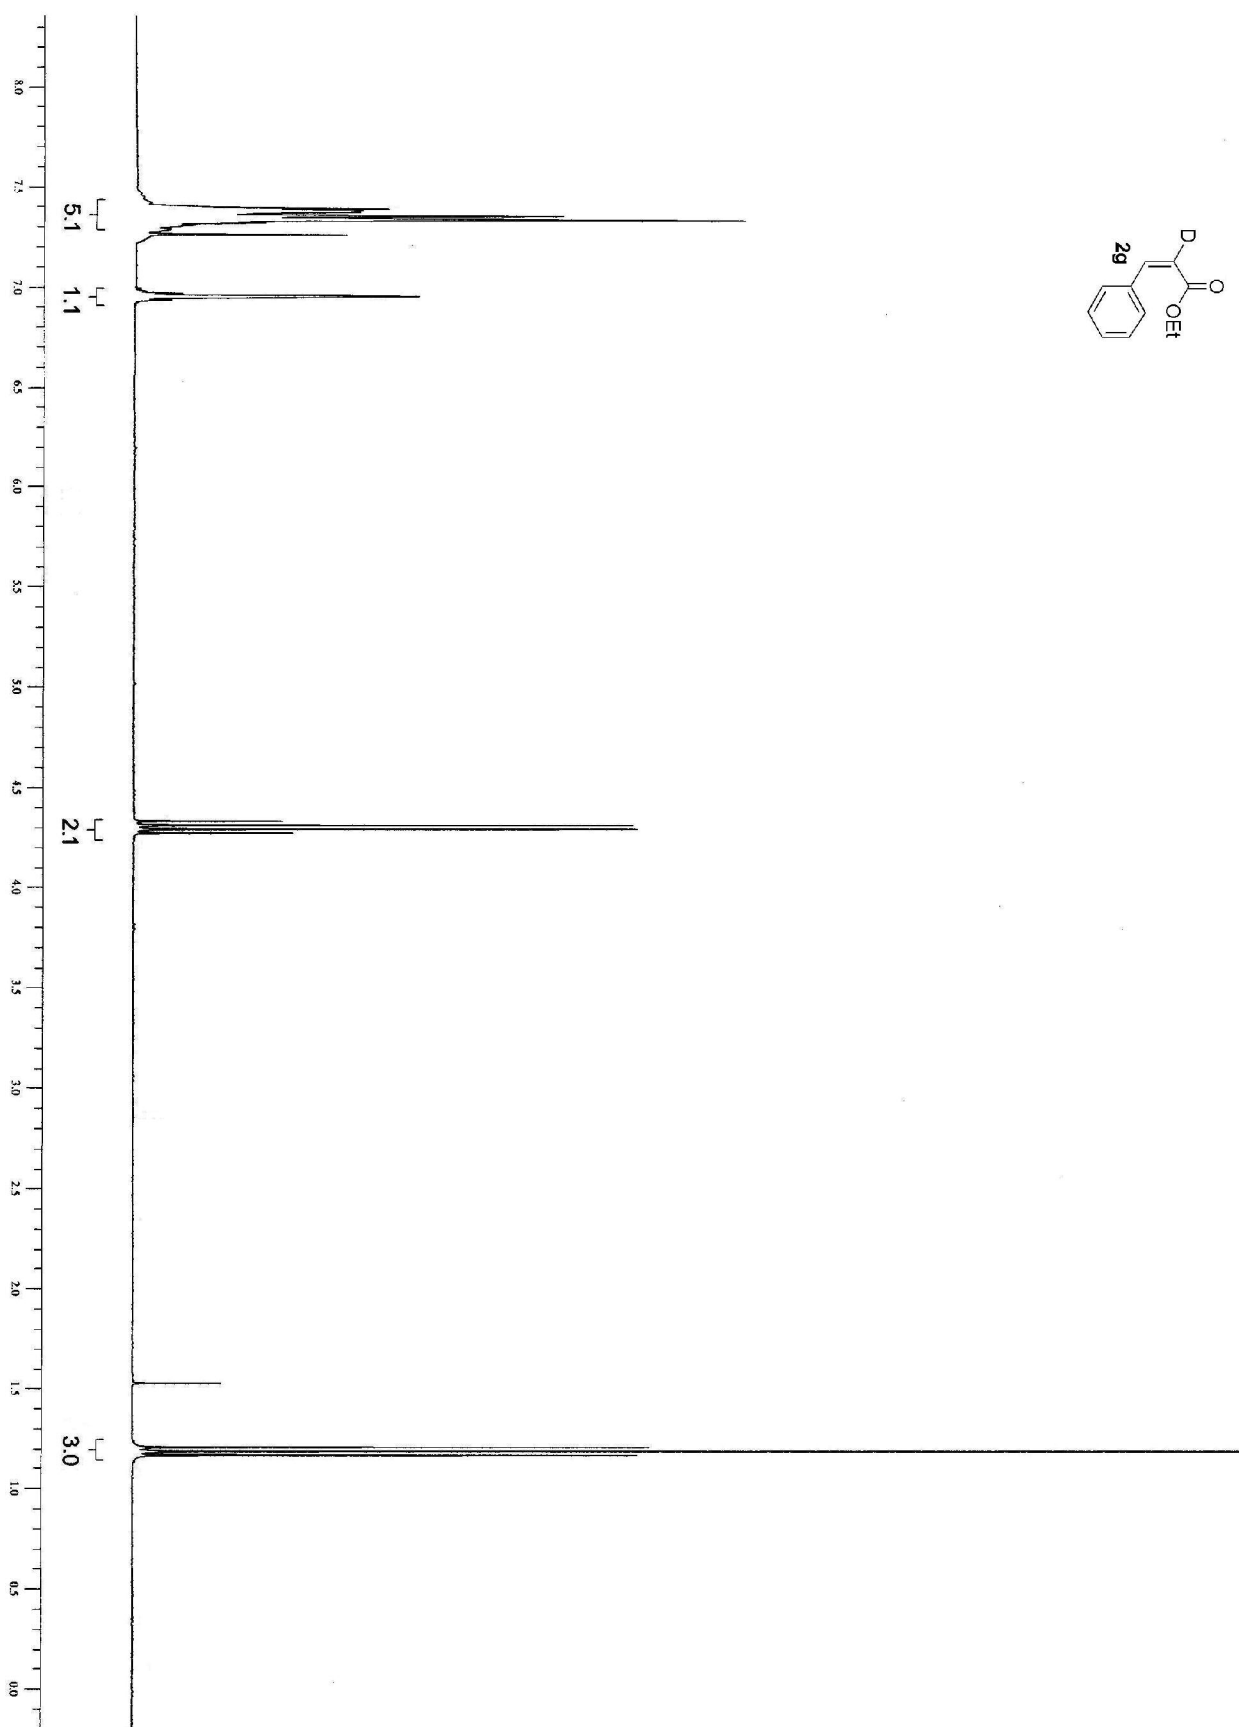

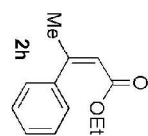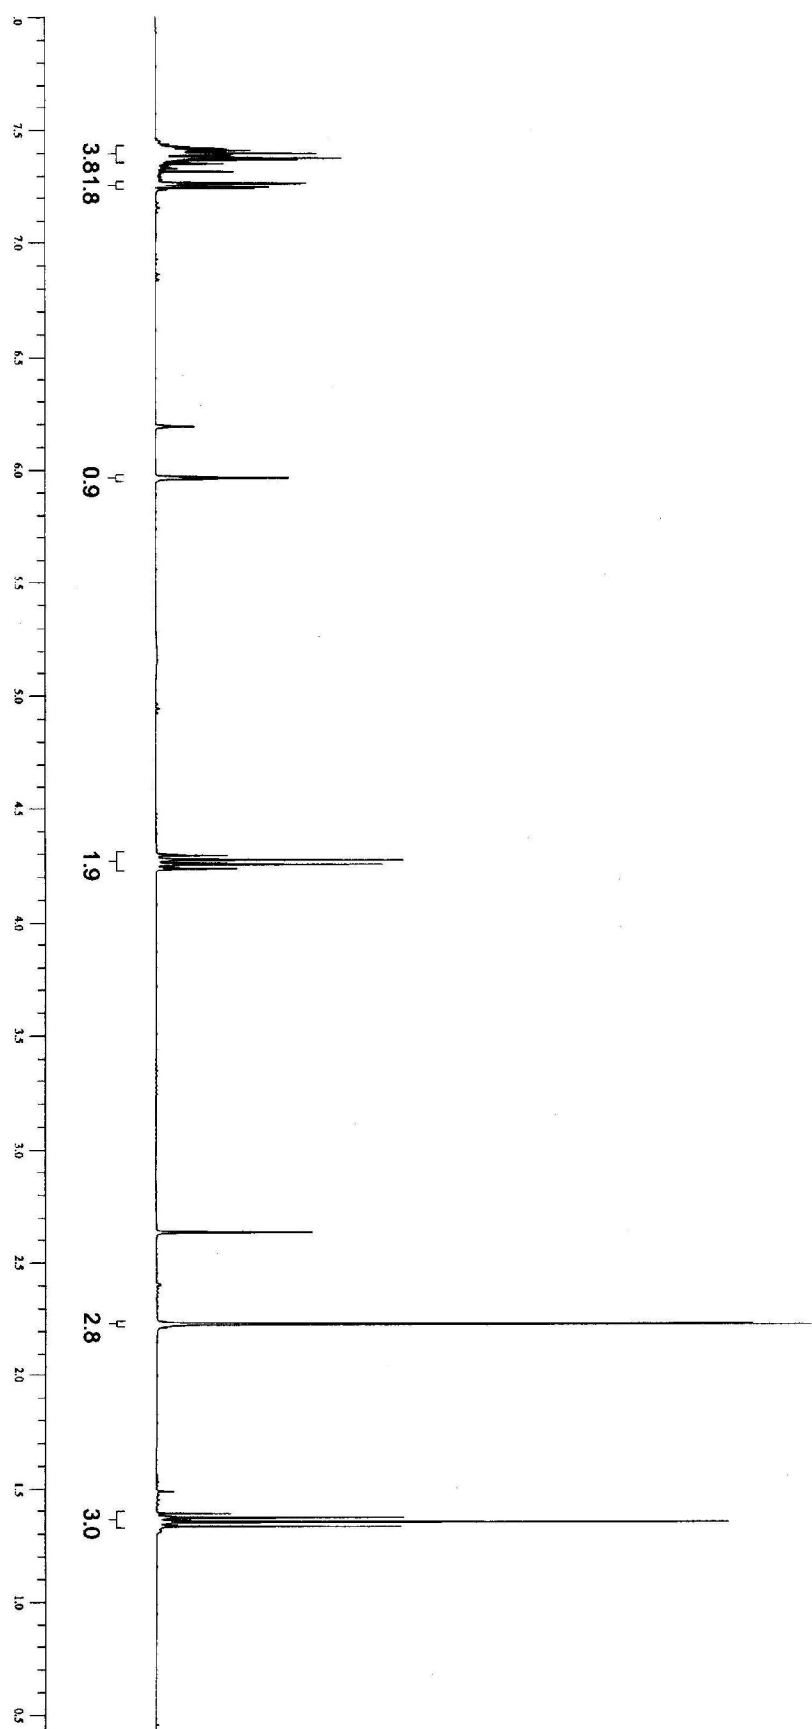

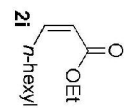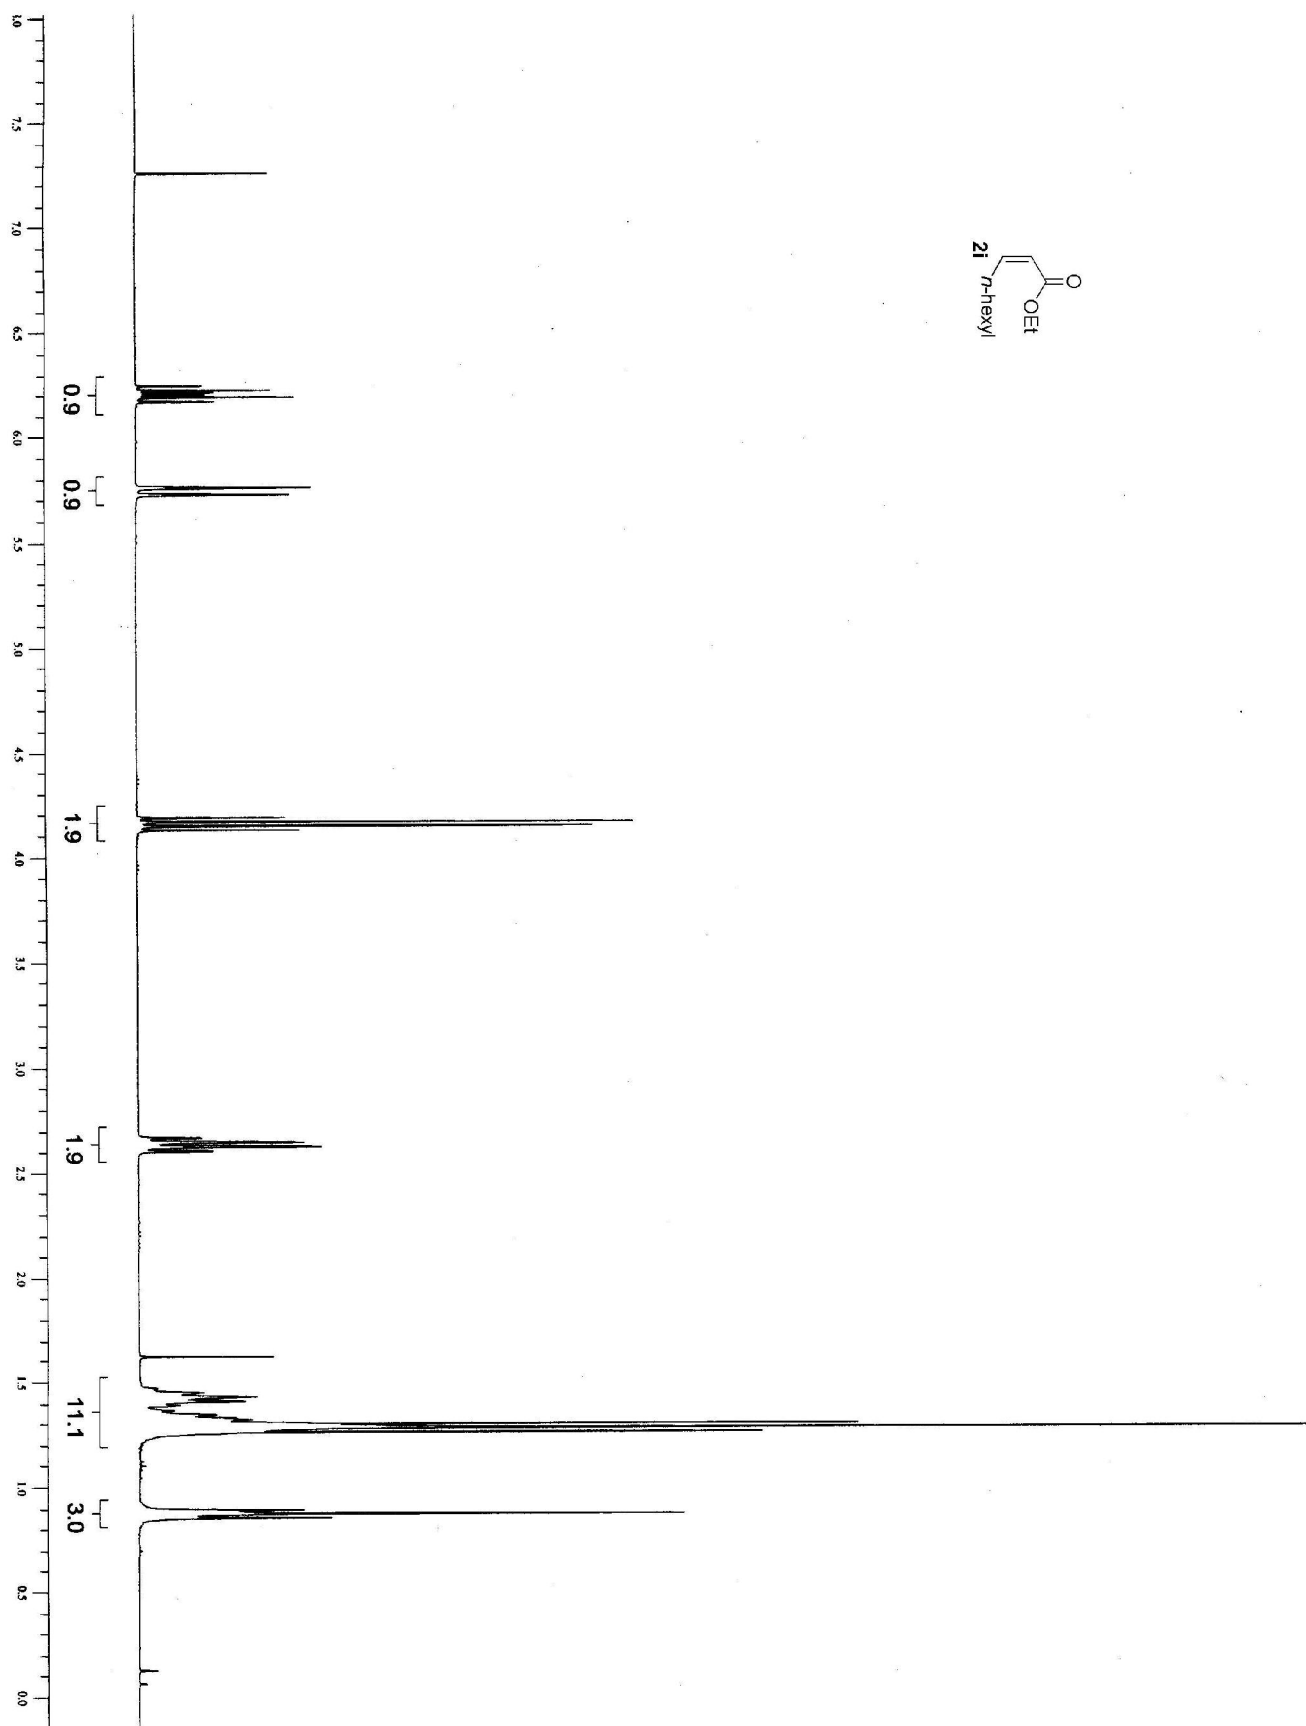

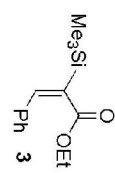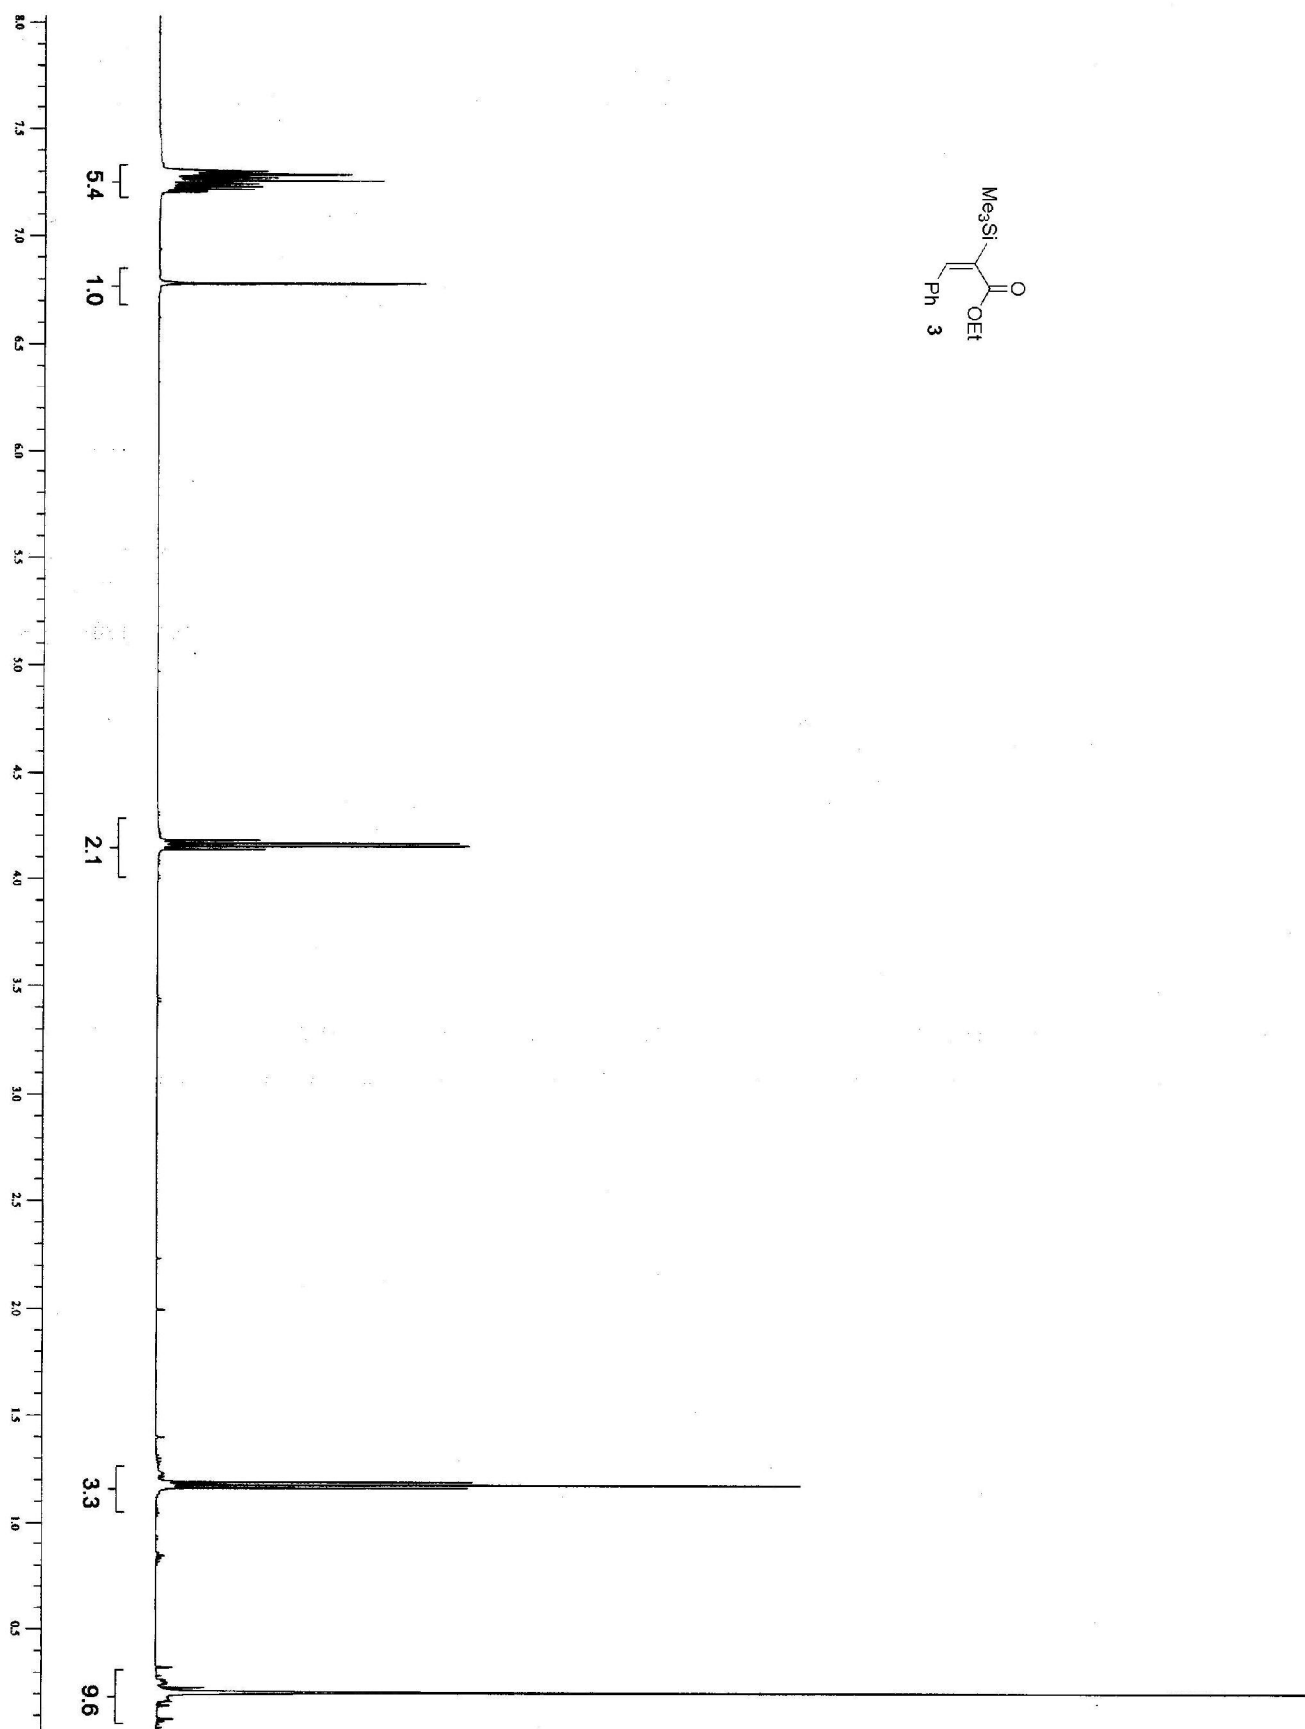

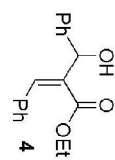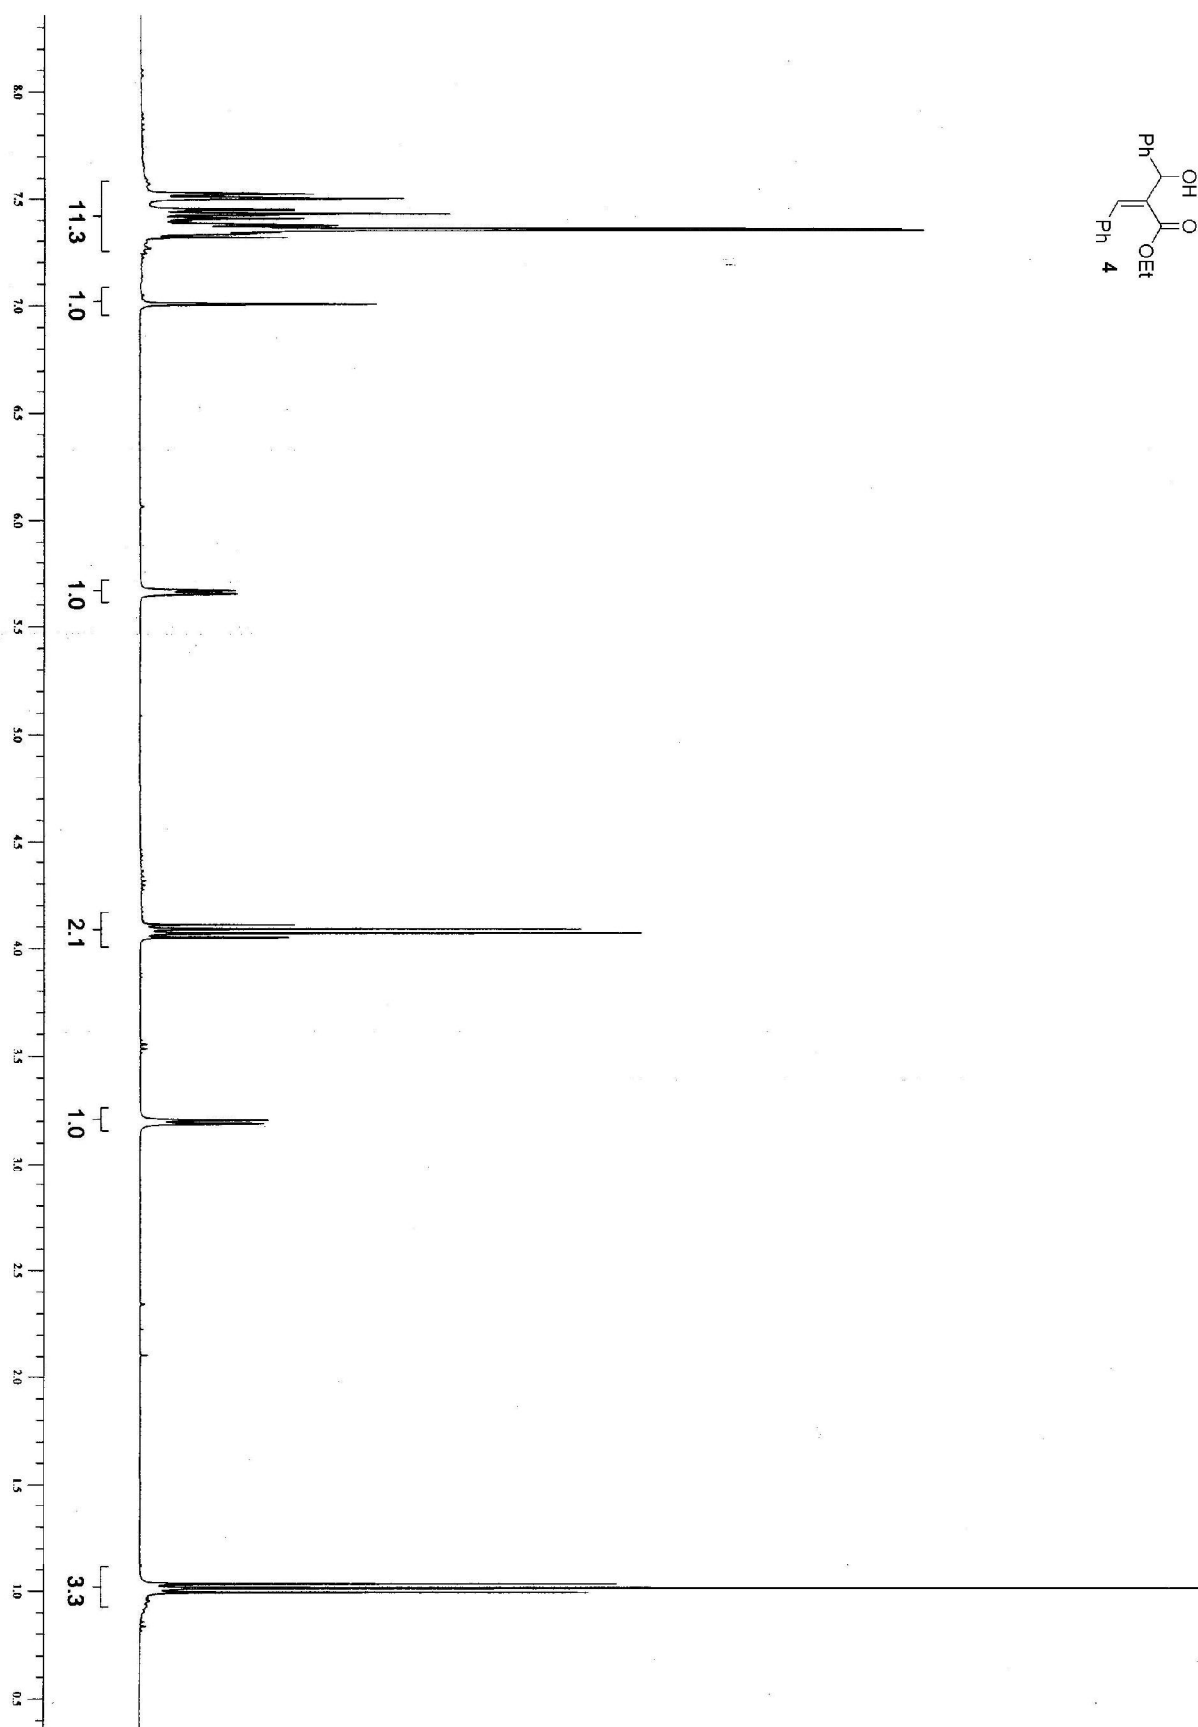



## References:

1. Shing, T. K. M.; Luk, T.; Lee, C. M. *Tetrahedron*. **2006**, 62, 6621.
2. The compound has been reported, but no spectroscopic data accompanied the paper. Huck, B. R.; Llamas, L.; Robarge, M. J.; Dent, T. C.; Song, J.; Hodnick, W. F.; Crumrine, C.; Stricker-Krongrad, A.; Harrington, J.; Brunden, K. R.; Bennani, Y. L. *Bioorg. Med. Chem. Lett.* **2006**, 16, 4130.
3. Kojima, S.; Takagi, R.; Akiba, K. *J. Am. Chem. Soc.* **1997**, 119, 5970.
4. Reetz, M. T.; Sommer, K. *Eur. J. Org. Chem.* **2003**, 3485.
5. Shi, Z.; He, C. *J. Org. Chem.* **2004**, 69, 3669.
6. Tani, M.; Sakaguchi, S.; Ishii, Y. *J. Org. Chem.* **2004**, 69, 1221.
7. Zinn, M. F.; Harris, T. M.; Hill, D. G.; Hauser, C. R. *J. Am. Chem. Soc.* **1963**, 85, 71.
8. Patois, C.; Savignac, P. *Tetrahedron Lett.* **1991**, 32, 1317.
9. Steinhuebel, D.; Palucki, M.; Davies, I. W. *J. Org. Chem.* **2006**, 71, 3282.
10. Boeckman, Jr., R. K.; Chinn, R. L. *Tetrahedron Lett.* **1985**, 41, 5005.
11. Ramachandran, P. V.; Rudd, M. T.; Burghardt, T. E.; Reddy, M. V. R. *J. Org. Chem.* **2003**, 68, 9310.
